# Supplementary material for: Gum Arabic protects the rat heart from ischemia/reperfusion injury through anti-inflammatory and antioxidant pathways
Source: PubMed Central journal article supplement (PMC9568585; doi:10.1038/s41598-022-22097-0), 2022-10-14

Figure 3S

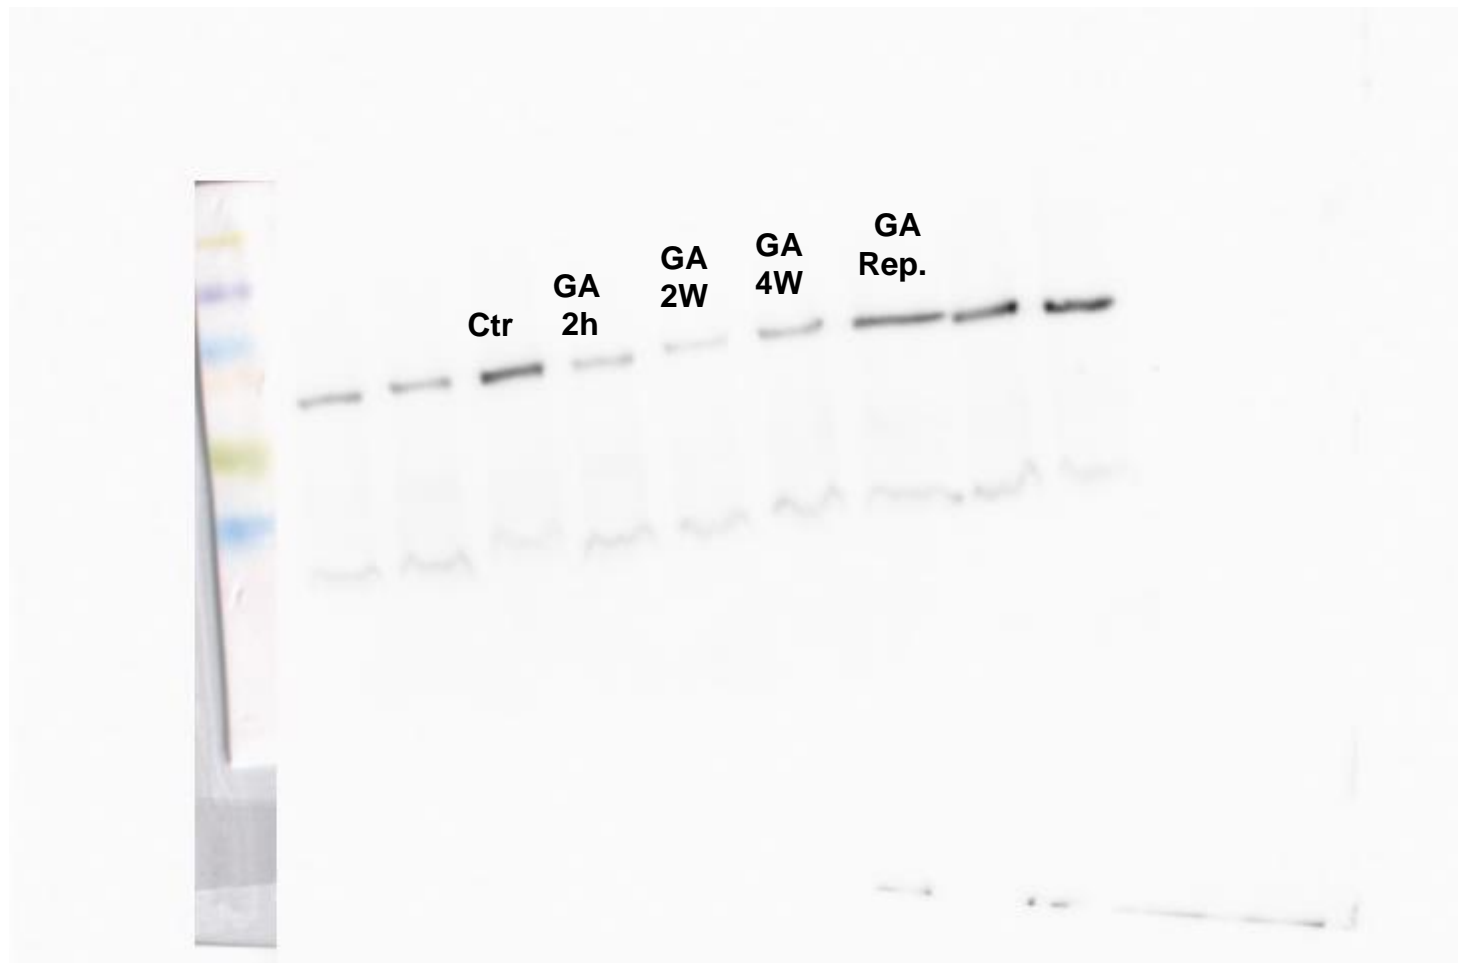

Figure 7S1

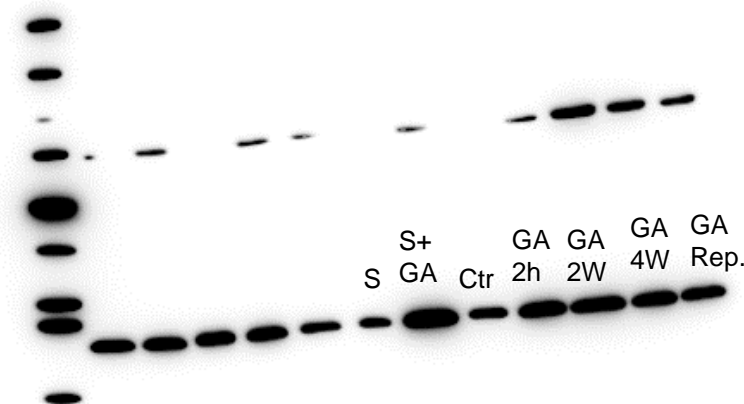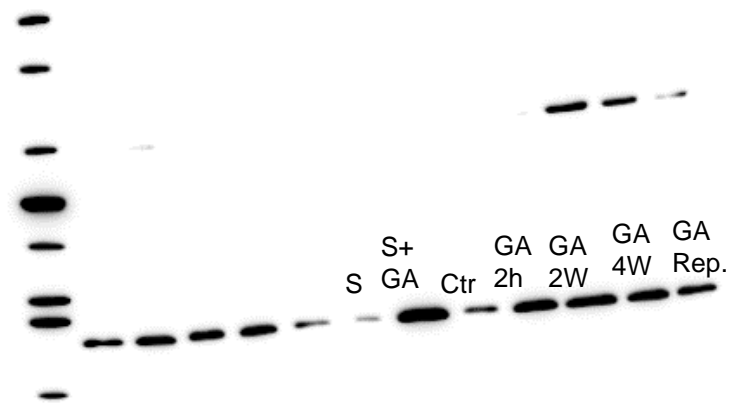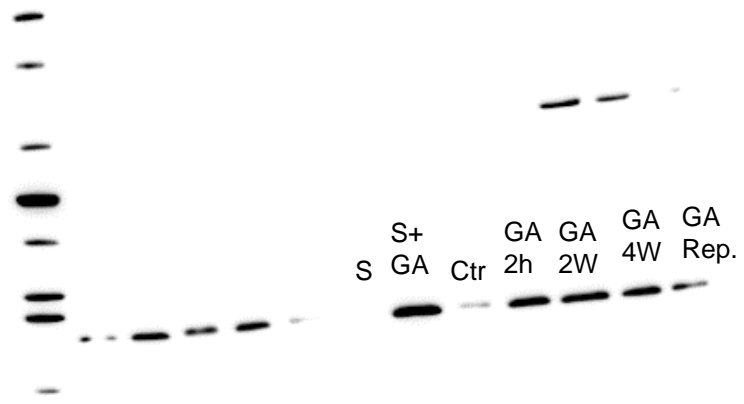

Supplement: 41598_2022_22097_MOESM1_ESM.pdf [file 41598_2022_22097_MOESM1_ESM.pdf]
